# Supplementary material for: Qualification of Non-Halogenated Organic Solvents Applied to Microsphere Manufacturing Process
Source: PubMed Central journal article supplement (PMC7285046; doi:10.3390/pharmaceutics12050425), 2020-05-06
Supplement: pharmaceutics-12-00425-s001.pdf [file pharmaceutics-12-00425-s001.pdf]

# Supplementary Materials: Qualification of Non-Halogenated Organic Solvents Applied to Microsphere Manufacturing Process

Hyunjin Shim and Hongkee Sah \*

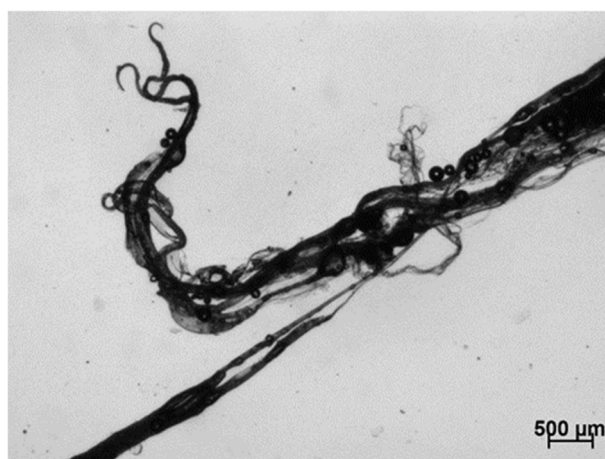

**Figure S1.** LM photograph of PLGA agglomerates appearing in an EA microsphere suspension. To prepare microspheres, a dispersed phase (250 mg PLGA/70 mg progesterone/3 ml EA) was emulsified in an EA-free aqueous phase. When the emulsion was subject to solvent removal, not only embryonic microspheres but also fiber-like PLGA agglomerates were generated. The bar size is 500  $\mu\text{m}$ .

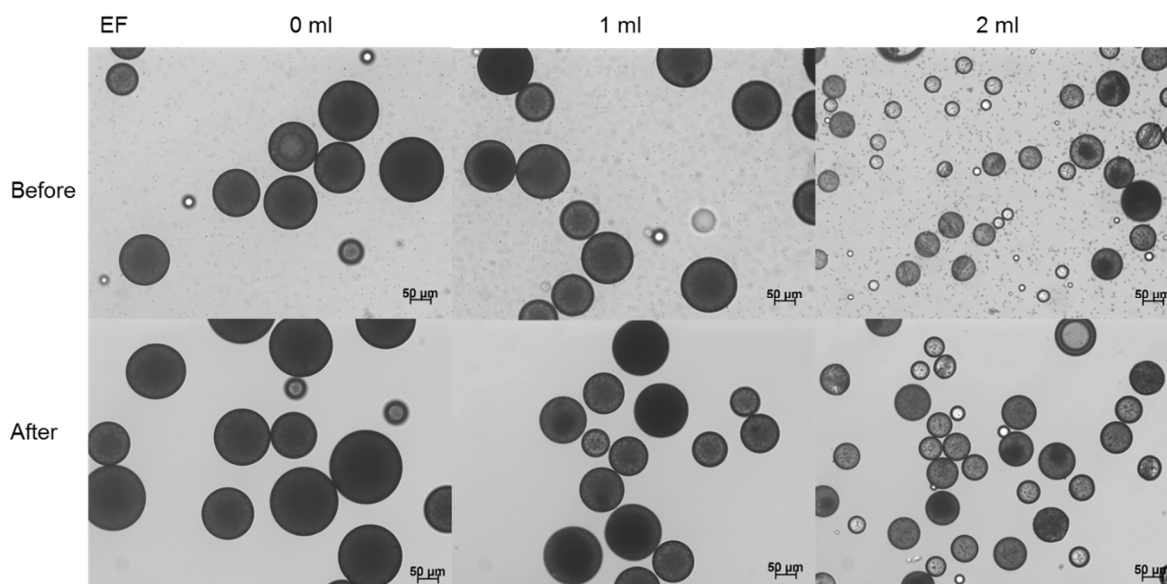

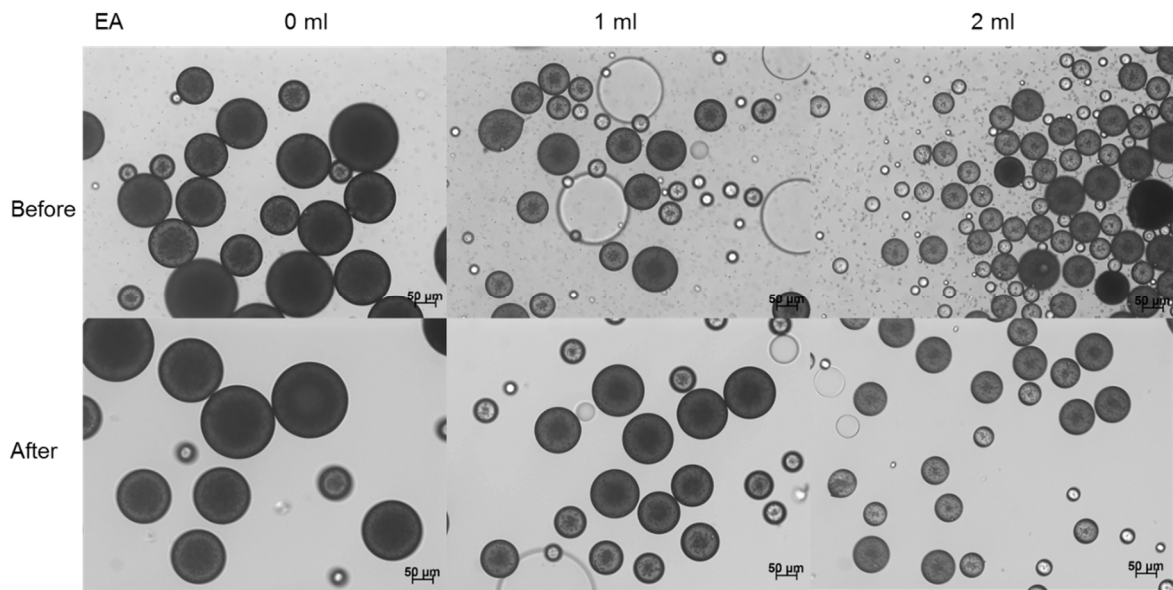

**Figure S2.** LM photographs of (top) EF and (bottom) EA microspheres suspensions before and after wet sieving. A dispersed phase (250 mg PLGA/70 mg progesterone/3 ml EF or EA) was emulsified in an aqueous phase in which 0 to 2 ml of the solvent was pre-dissolved. The bar size is 50  $\mu\text{m}$ .

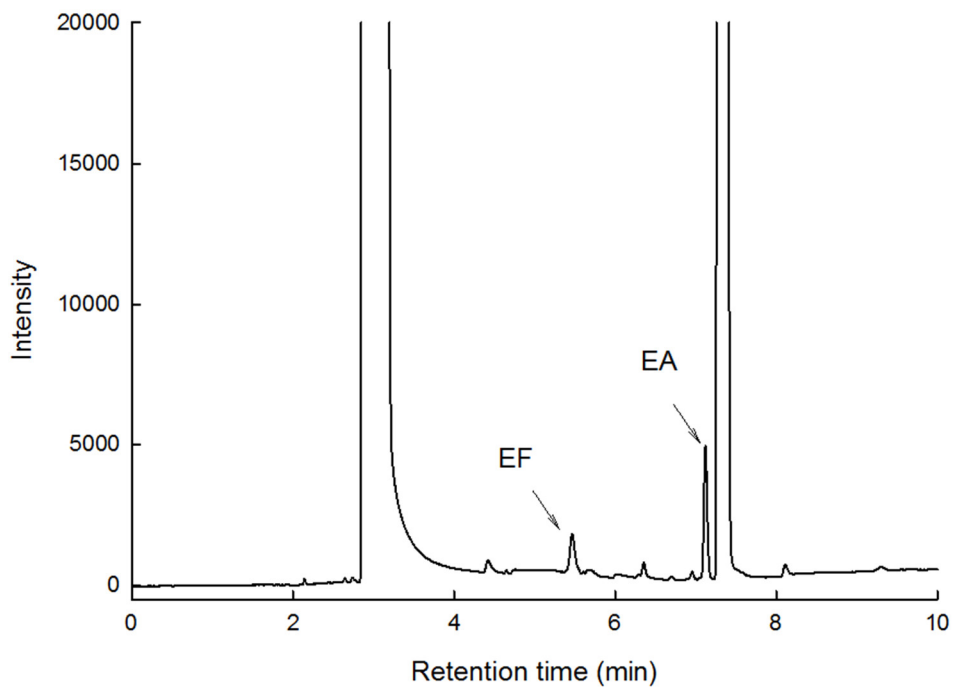

**Figure S3.** A typical GC chromatogram of a microsphere sample that followed the analytical procedure described in text. Arrows on the gas chromatogram indicate the peaks of EF and EA.
